# Personalized mathematical oncology: Challenges and opportunities

Michael C. Luo<sup>1</sup>, Elpiniki Nikolopoulou<sup>2□</sup>, Jana L. Gevertz<sup>1\*</sup>

**1** Department of Mathematics and Statistics, The College of New Jersey, Ewing, NJ, USA

**2** School of Mathematical and Statistical Sciences, Arizona State University, Tempe, AZ, USA

□Current Address: Nationwide, Columbus, OH, USA

\* [gevertz@tcnj.edu](mailto:gevertz@tcnj.edu)

## Abstract

An outstanding challenge in the clinical care of cancer is moving from a one-size-fits-all approach that relies on population-level statistics towards personalized therapeutic design. Mathematical modeling is a powerful tool in treatment personalization, as it allows for the incorporation of patient-specific data so that treatment can be tailor-designed to the individual. In this work, we employ two fitting methodologies to personalize treatment in a mathematical model of murine cancer immunotherapy. Unexpectedly, we found that the predicted personalized treatment response is sensitive to the fitting methodology utilized. This raises concerns about the ability of mathematical models, even relatively simple ones, to make reliable predictions about individual treatment response. Our analyses shed light onto why it can be challenging to make personalized treatment recommendations from a model, but also suggest ways we can increase our confidence in personalized mathematical predictions.

## Author summary

As we enter the era of healthcare where personalized medicine becomes a more common approach to treating cancer patients, harnessing the power of mathematical models will only become more essential. Using a preclinical dataset on cancer immunotherapy, we explore the challenges and limitations that arise when trying to move from a one-size-fits-all approach to treatment design towards personalized therapeutic design. These challenges lead to actionable suggestions on how to ascertain when we have enough data to personalize treatment, or how to determine when we can have confidence that an optimal-for-the-average prediction will have a comparable impact on an individual. We also show how mathematical modeling can suggest what data is needed to increased confidence in personalized predictions.

## Introduction

The conventional approach for developing a cancer treatment protocol relies on measuring average efficacy and toxicity from population-level statistics in randomized clinical trials [1–3]. However, it is increasingly recognized that heterogeneity, both between patients and within a patient, is a defining feature of cancer [4, 5]. This

inevitably results in a portion of cancer patients being over-treated and suffering toxicity consequences from the standard-of-care dose, and another portion being under-treated and not benefiting from the expected efficacy of the treatment [6].

For these reasons, in the last decade there has been much interest in moving away from this ‘one-size-fits-all’ approach to cancer treatment and towards personalized therapeutic design (also called predictive or precision medicine) [1, 2, 7]. Collecting patient-specific data has the potential to improve treatment response to chemotherapy [6, 8–11], radiotherapy [12–14], and targeted molecular therapy [11, 15–17]. However, it has been proposed that personalization may hold the most promise when it comes to immunotherapy [18]. Immunotherapy is an umbrella term for methods that increase the potency of the immune response against cancer. Unlike other treatment modalities that directly attack the tumor, immunotherapy depends on the interplay between two complex systems (the tumor and the immune system), and therefore may exhibit more variability across individuals [18].

Mathematical modeling has become a valuable tool for understanding tumor-drug interactions. However, just as clinical care is guided by standardized recommendations, most mathematical models are validated based on population-level statistics from preclinical or clinical studies [19]. To truly realize the potential of mathematical models in the clinic, these models must be individually parameterized using measurable, patient-specific data. Only then can modeling be harnessed to answer some of the most pressing questions in precision medicine, including selecting the right drug for the right patient, identifying optimal drug combinations for a patient, and prescribing a treatment schedule that maximizes efficacy while minimizing toxicity.

Efforts to personalize mathematical models have been undertaken to understand glioblastoma treatment response [20, 21], to identify optimal chemotherapeutic and granulocyte colony-stimulating factor combined schedules in metastatic breast cancer [22], to identify optimal maintenance therapy chemotherapeutic dosing for childhood acute lymphoblastic leukemia [9], and to identify optimized doses and dosing schedules of the chemotherapeutic everolimus with the targeted agent sorafenib for solid tumors [23]. Interesting work has also been done in the realm of radiotherapy, where individualized head and neck cancer evolution has been modeled through a dynamic carrying capacity informed by patient response to their last radiation dose [24].

Beyond these examples, most model personalization efforts have focused on prostate cancer, as prostate-specific antigen is a clinically measurable marker of prostate cancer burden [25] that can be used in the parameterization of personalized mathematical models. The work of Hirata and colleagues has focused on the personalization of intermittent androgen suppression therapy using retrospective clinical trial data [26, 27]. Other interesting work using clinical trial data has been done by Agur and colleagues, focusing on individualizing a prostate cancer vaccine using retrospective phase 2 clinical trial data [25, 28], as well as androgen deprivation therapy using data from an advanced stage prostate cancer registry [29]. Especially exciting work on personalizing prostate cancer has been undertaken by Gatenby and colleagues, who used a mathematical model to discover patient-specific adaptive protocols for the administration of the chemotherapeutic agent abiraterone acetate [30]. Among the 11 patients in a pilot clinical trial treated with the personalized adaptive therapy, they observed the median time to progression increased to at least 27 months as compared to 16.5 months observed with standard dosing, while also using a cumulative drug amount that was 47% less than the standard dosing [17].

These examples show the promise of employing mathematical models to make individualized treatment recommendations for cancer patients. However, they also reflect one of the main challenges - having enough data to parameterize a predictive mathematical model. One approach to overcoming such limited data is through the use

of a virtual patient cohort [31,32], though in this work we take an alternative approach. In particular, we explore the consequences of fitting limited preclinical patient data to a minimal mathematical model and using that fit model to make individualized treatment predictions. In Materials and methods, we describe the preclinical data collected by Huang et al. [33] on a mouse model of melanoma treated with two forms of immunotherapy, and our previously-developed mathematical model that has been validated against population-level data from this trial [34]. Individual mouse volumetric time-course data is fit to our dynamical systems model using two different approaches detailed in Materials and methods: the first fits each mouse independent of the other mice in the population, whereas the second constrains the fits to each mouse using population-level statistics. In Results and Discussion, we demonstrate that, unexpectedly, the treatment response identified for an individual mouse is *sensitive to the fitting methodology utilized*. We explore the causes of these predictive discrepancies and how robustness of the optimal-for-the-average treatment protocol influences these discrepancies. We conclude with actionable suggestions for how to increase our confidence in personalized mathematical predictions.

## Materials and methods

### Data Set

The data in this study considers the impact of two immunotherapeutic protocols on a murine model of melanoma [33]. The first protocol uses oncolytic viruses (OVs) that are genetically engineered to lyse and kill cancer cells. In [33] the OVs are immuno-enhanced by inserting transgenes that cause the virus to release 4-1BB ligand (4-1BBL) and interleukin (IL)-12, both of which result in the stimulation of the tumor-targeting T cell population [33]. The preclinical work of Huang et al. has shown that oncolytic viruses carrying 4-1BBL and IL-12 (which we will call Ad/4-1BBL/IL-12) can cause tumor debulking via virus-induced tumor cell lysis, and immune system stimulation from the local release of the immunostimulants [33].

The second protocol utilized by Huang et al. are dendritic cell (DC) injections. DCs are antigen-presenting cells that, when exposed to tumor antigens *ex vivo* and intratumorally injected, can stimulate a strong adaptive immune response against cancer cells [33]. Huang et al. showed that combination of Ad/4-1BBL/IL-12 with DC injections results in a stronger antitumor response than either treatment individually [33].

### Mathematical Model

Our model contains the following five ordinary differential equations:

$$\frac{dU}{dt} = rU - \beta \frac{UV}{N} - (\kappa_0 + c_{kill}I) \frac{UT}{N}, \quad U(0) = U_0, \quad (1)$$

$$\frac{dI}{dt} = \beta \frac{UV}{N} - \delta_I I - (\kappa_0 + c_{kill}I) \frac{IT}{N}, \quad I(0) = 0, \quad (2)$$

$$\frac{dV}{dt} = u_V(t) + \alpha \delta_I I - \delta_V V, \quad V(0) = 0, \quad (3)$$

$$\frac{dT}{dt} = c_T I + \chi_D D - \delta_T T, \quad T(0) = 0, \quad (4)$$

$$\frac{dD}{dt} = u_D(t) - \delta_D D, \quad D(0) = 0, \quad (5)$$

where  $U$  is the volume of uninfected tumor cells,  $I$  is the volume of OV-infected tumor cells,  $V$  is the volume of free OVs,  $T$  is the volume of tumor-targeting T cells,  $D$  is the

volume of injected dendritic cells, and  $N$  is the total volume of cells (tumor cells and T cells) at the tumor site. When all parameters and time-varying terms are positive, this models captures the effects of tumor growth and response to treatment with Ad/4-1BBL/IL-12 and DCs [34]. By allowing various parameters and time-varying terms to be identically zero, other treatment protocols tested in Huang et al. [33] can also be described.

This model was built in a hierarchical fashion, details of which have been described extensively elsewhere [31, 34–36]. Here, we briefly summarize the full model. Uninfected tumor cells grow exponentially at a rate  $r$ , and upon being infected by an OV convert to infected cancer cells at a density-dependent rate  $\beta UV/N$ . These uninfected cells get lysed by the virus or other mechanisms at a rate of  $\delta_I$ , thus acting as a source term for the virus by releasing  $\alpha$  free virions (on average) into the tissue space. Viruses decay at a rate of  $\delta_V$ .

The activation/recruitment of tumor-targeting T cells can happen in two ways: 1) stimulation of cytotoxic T cells due to 4-1BBL or IL-12 (modeled through  $I$ , at a rate of  $c_T$ , as infected cells are the ones to release 4-1BBL and IL-12), and 2) production due to the externally-primed dendritic cells (at a rate of  $\chi_D$ ). These tumor-targeting T cells indiscriminately kill uninfected and infected tumor cells, with the rate of killing that depends on IL-12 and 4-1BBL production (again, modeled through  $I$  in the term  $(\kappa_0 + c_{kill}I)$ ), and they can also experience natural death at a rate of  $\delta_T$ . The time-dependent terms,  $u_V(t)$  and  $u_D(t)$ , represent the source of the drug and are determined by the delivery and dosing schedule of interest.

## Fitting Methodologies

### Independently Fitting Individuals

Our first attempt at individualized fitting is to find the parameter set that minimizes the  $L^2$ -norm between the model and the individual mouse data:

$$\zeta = \sum_{t=0}^n (V_{model}(t) - V_{data}(t))^2, \quad (6)$$

where  $V_{model}(t) = U(t) + I(t)$  is the volumetric output predicted by our model in eqns. (1)-(5), and  $V_{data}(t)$  represents the volumetric data for an individual mouse.

To independently fit an individual mouse, parameter space is first quasi-randomly sampled using high-dimensional Sobol' Low Discrepancy Sequences (LDS). LDS are designed to give rise to quasi-random numbers that sample points in space as uniformly as possible, while also (typically) having faster convergence rates than standard Monte Carlo sampling methods [37]. After the best-fit parameter set has been selected among the  $10^6$  randomly sampled sets chosen by LDS, the optimal is refined using simulated annealing [38]. Having observed that the landscape of the objective function near the optimal parameter set does not contain local minima, we randomly perturb the LDS-chosen parameter set, and accept any parameter changes that decrease the value of the objective function (making the method equivalent to gradient descent). This random perturbation process is repeated until no significant change in  $\zeta$  can be achieved (in particular, until the relative change in  $\zeta$  for the last five accepted parameter sets is less than  $10^{-6}$ ), and we call this final parameter set the optimal parameter set.

It is important to note that, by approaching fitting in this way, the parameters for Mouse  $i$  depend only the volumetric data for Mouse  $i$ ; that is, the volumetric data for the other mice are not accounted for.

## Fitting Individuals with Population-Level Constraints

Nonlinear mixed effects (NLME) models incorporate fixed and random effects to generate models to analyze data that are non-independent, multilevel/hierarchical, longitudinal, or correlated [39]. Fixed effects refer to parameters that can generalize across an entire population. Random effects refer to parameters that differ between individuals that are randomly sampled from a population.

The mixed effects model we will utilize is of the form:

$$y_{ij} = T(t_{ij}, \psi_i) + bT(t_{ij}, \psi_i)\epsilon_{ij}, i = 1, \dots, M, j = 1, \dots, n_i, \quad (7)$$

where  $y_{ij}$  is the predicted tumor volume at each day  $j$  for each individual  $i$  (that is, at time  $t_{ij}$ ),  $M = 8$  is the number of mice,  $n_i = 31$  is the number of observations per mouse,  $\psi_i$  is the parameter vector for the structural model for each individual, and  $\epsilon_{ij}$  is a variable describing random noise. Here we made the assumption that the error is a scalar value proportional to our structural model.

Typically, NLME models attempt to maximize the likelihood of the parameter set given the available data. There does not exist a general closed-form solution to this maximization problem [40], so numerical optimization is often needed to find a maximum likelihood estimate. In this work, we employ Monolix [41], which uses a Markov Chain Monte Carlo method to find values of the model parameters that optimize the likelihood function. To implement NLME in Monolix, we first processed and arranged our experimental data (tumor volume and dosing schedule) in a Monolix-specified spreadsheet. To avoid predictive errors, we censored the data, as detailed in [41]. More specifically, all tumor volumes less than  $1 \text{ mm}^3$  were set to 0. This was done to prevent over-fitting to these data points at the expense of the rest of the data.

We assume that each parameter  $\psi_{i,k} \in \psi_i$  is lognormally distributed with mean  $\bar{\psi}_{i,k}$  and standard deviation  $\omega_{i,k}$ :

$$\log(\psi_{i,k}) \sim \mathcal{N}(\log(\bar{\psi}_{i,k}), \omega_{i,k}^2). \quad (8)$$

Based on previous fits to the average of the data in [36], we used the following set of initial guesses for the population parameters:

$$[r, \beta, \alpha, \delta_V, \kappa_0, \delta_T, \chi_D, \delta_I, c_{kill}, c_T, \delta_D, U_0] = [0.32, 1, 3, 2.3, 2, 0.35, 5.5, 1, 0.51, 1.2, 0.35, 55.6],$$

with the initial standard deviations chosen as:

$$[\omega_r, \omega_\beta, \omega_\alpha, \omega_{\delta_V}, \omega_{\kappa_0}, \omega_{\delta_T}, \omega_{\chi_D}, \omega_{\delta_I}, \omega_{c_{kill}}, \omega_{c_T}, \omega_{\delta_D}, \omega_{U_0}] = [0.25, 0.5, 1, 0.1, 1, 0.1, 0.25, 0.1, 0.5, 0.5, 0.1, 5].$$

## Practical Identifiability via the Profile Likelihood Method

It is well-established that estimating a unique parameter set for a mathematical model can be challenging due to the limited availability of often noisy experimental data [42]. A non-identifiable model is one in which multiple parameter sets give “good” fits to the experimental data. Here, we will study the practical identifiability of our system in eqns. (1) - (5) using the profile likelihood approach [43, 44].

A single parameter is profiled by fixing it across a range of values, and subsequently fitting all other model parameters to the data [42]. To execute the profile likelihood method, let  $p$  be the vector that contains all parameters of the model,  $\theta$  be one

parameter of interest contained in the vector  $p$ . The profile likelihood  $PL$  for the parameter  $\theta$  is defined in [45] as:

$$PL_k(\theta) = \min_{p \in \{p | p_k = \theta\}} (-2LL(p; z_1, \dots, z_N)) = \min_{p \in \{p | p_k = \theta\}} \left( \sum_{n=1}^N \left( \frac{z_n - y(t_n, p)}{\sigma_n} \right)^2 \right), \quad (9)$$

where  $z_n$  for  $n = 1, \dots, N$  is the measured data that is assumed to follow a normal distribution with mean  $y(t_n, p)$  and variance  $\sigma^2$ , and  $LL(p; z_1, \dots, z_N)$  is the log of the likelihood function. The likelihood function represents the likelihood of the measured data  $z_n$  given a model with parameters  $p$  [46]. The profile likelihood curve for any parameter of interest  $\theta$  is found using the following process:

1. Determine a range for the parameter values of  $\theta$ .
2. Fix  $\theta = \theta^*$  at a value in the range.
3. For the fixed value in step 2 we fit the parameters  $p_k^*$  and obtain the best-fit values by minimizing the objective function defined in eqn. (9).
4. Evaluate the objective function at those optimum values for the fixed value of  $\theta^*$ .
5. Repeat the process described in steps 2-4 for a discrete set of values in the range of the parameter  $\theta$ . This yields to the profile likelihood function for the parameter  $\theta$ .

Once  $PL(\theta)$  is determined, the confidence interval for  $\theta$  at a level of significance  $\alpha$  can be computed using:

$$PL(\theta) - 2LL(p_k^*) \leq \Delta_\alpha \quad (10)$$

where  $\Delta_\alpha$  denotes the  $\alpha$  quantile of the  $\chi^2$  distribution with  $df$  degrees of freedom (which represents the number of fit model parameters when calculating  $PL(\theta)$ ) [42]. We use  $\alpha = 0.95$  for a 95% confidence interval. The intersection points between the threshold  $2LL(p_k^*) + \Delta_\alpha$  and  $PL(\theta)$  result in the bounds of the confidence interval. A parameter is said to be practically identifiable if the shape of the profile likelihood plot is close to quadratic on a finite confidence interval [47]. Otherwise, a parameter is said to be practically unidentifiable.

## Results and Discussion

### Personalized Fits

The individual mouse data in response to treatment with Ad/4-1BBL/IL-12 + DCs [33] is fit using the two methodologies discussed previously: 1) quasi-Monte-Carlo method with simulated annealing in which each mouse is fit independently (which we will call the “QMC” method for short), and 2) nonlinear mixed effects modeling in which population-level statistics constrain individual fits. In Fig. 1, we can see the best-fit for each mouse using the two fitting approaches.

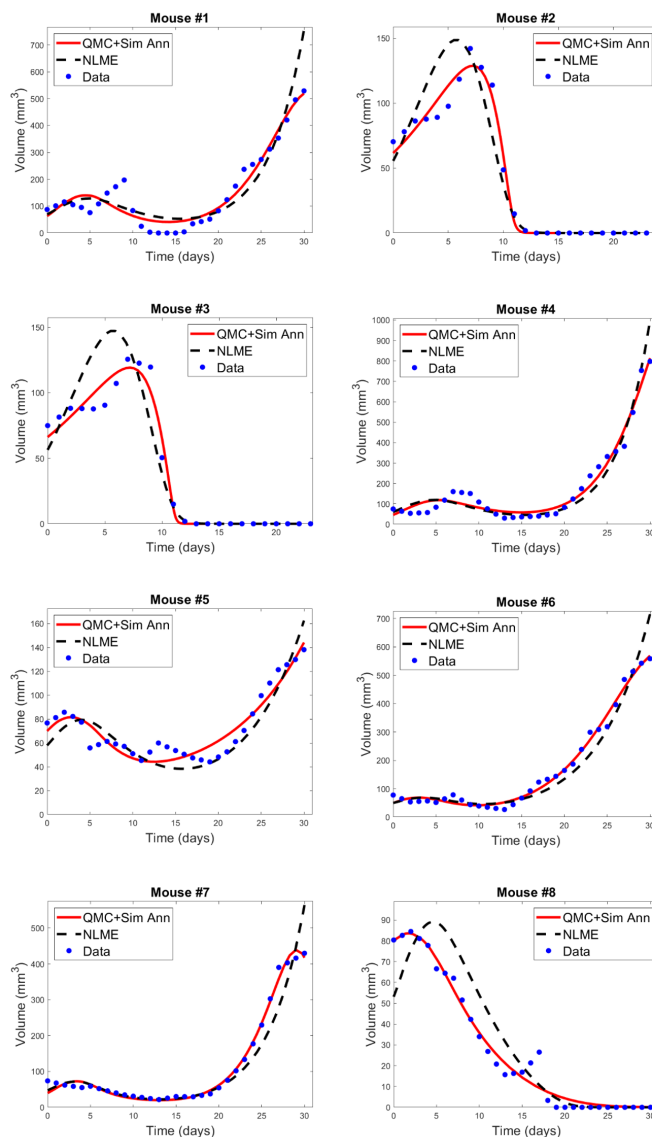

**Fig 1.** Best-fit for each mouse treated with Ad/41BBL/IL-12 and DCs in the order VDVDVD at a dose of  $2.5 \times 10^9$  OVs and  $10^6$  DCs [33]. The QMC fits (in which each mouse is treated independently of the others) are shown in red, and the NLME fits are shown in black. The experimental data (blue) is also provided on each plot.

We observe that for each mouse, the QMC algorithm results in a fit that more accurately captures the dynamics in the experimental data. The differences between the two fitting methodologies explain why this is occurring. NLME assumes each parameter is sampled from a lognormal distribution whose mean and variance are determined by the full population of mice. (The estimated lognormal distributions for each model parameter are shown in Fig. S1.) On the other hand, the QMC algorithm fits each mouse independently, and the only constraint imposed on the parameters is a nonnegativity constraint. This allows the QMC algorithm to explore a much larger region of parameter space, resulting in better fits. The downside, as we will show, is that the QMC algorithm may be selecting parameters that are not biologically realistic.

We have established that the parametric constraints across the two fitting

methodologies explain the goodness-of-fit differences seen in Fig. 1. However, this does not tell us *which* parameters vary across fitting methodologies and which, if any, are conserved. In Fig. 2 and S2 we show the best-fit parameter value for each mouse and fitting methodology *relative to the best-fit parameter value for the average mouse*. For example, the best-fit value of the tumor growth rate  $r$  to the average of the control data has been shown to be  $r = 0.3198$  [34]. Since Mouse 1 has a relative value of 1.0916 when fitting is done using QMC, the value of  $r$  predicted for that Mouse is 9.16% larger than the value for the average mouse, meaning QMC predicts  $r = 0.3491$  for Mouse 1. On the other hand, the relative value is 0.7512 when fitting is done using NLME, meaning the predicted value is  $r = 0.2402$ , which is 24.88% less than the value for the average mouse.

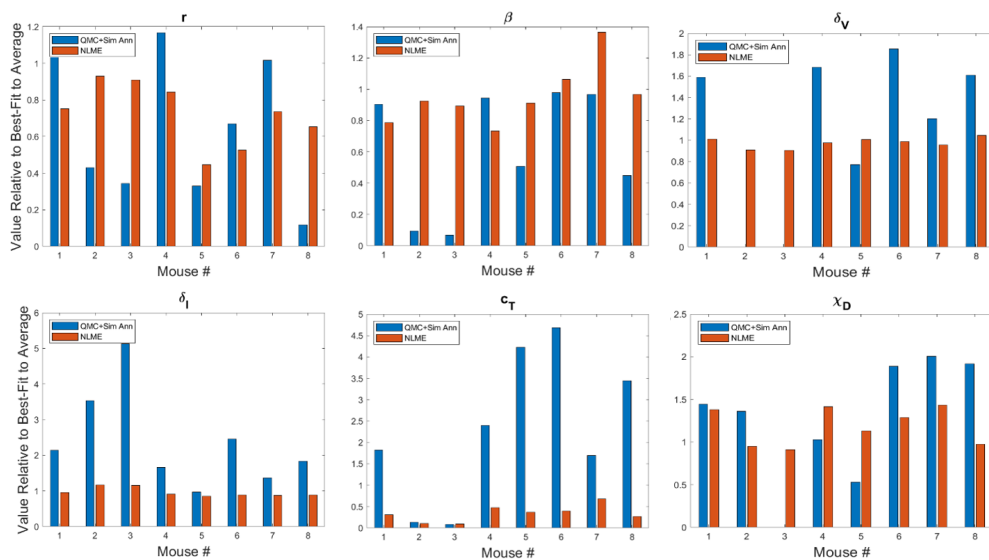

**Fig 2.** Best-fit values of tumor growth rate parameter  $r$ , virus infectivity parameter  $\beta$ , viral decay rate  $\delta_V$ , infected cell lysis rate  $\delta_I$ , T cell stimulation term by immunostimulants  $c_T$ , and T cell stimulation term by DCs  $\chi_D$ . The best-fit values are shown for each mouse and are presented relative to the best-fit value of the parameter in the average mouse [34]. Therefore, a value of 1 means the parameter value is equal to that in the average mouse, less than 1 is a smaller value, and greater than 1 is a larger value. Values for other model parameters are shown in Fig. S2.

We observe that while the value a parameter can take on across methodologies is usually of the same order of magnitude, substantial differences can exist across methodologies in essentially all parameters. Generally speaking, NLME-associated parameters exhibit smaller variations from the best-fit parameter for the average mouse. This occurs because the full population of mice constrain the lognormal distribution that each parameter is sampled from.

Compare this to the QMC-associated parameters, which are searched for in an unrestricted region of non-negative parameter space. Some biologically unlikely things happen when we look at the QMC parameters - a good example of this are the best-fit values of the viral decay rate  $\delta_V$  in Fig. 2. For Mouse 2 and 3 (which we see in Fig. 1 are successfully treated by the experimental treatment protocol), QMC predicts that the optimal parameter set has  $\delta_V = 0$ . Biologically, this attributes treatment success (at least partially) to the fact that the injected OVs never decay! While it certainly seems reasonable that if the treatment was never eliminated from the body, the tumor volume would go to zero, having no viral decay is nonsensical. So even though the QMC parameter sets give better fits to the data, the guarantee of a biologically-reasonable



value for each parameter is sacrificed. 245

Looking across methodologies, parameter disparities are the most pronounced in  $c_T$ , 246  
the rate of cytotoxic T cell stimulation from 4-1BBL and IL-12. The QMC-predicted 247  
parameters cover a much larger range of values relative to the average mouse. 248  
According to the QMC fits,  $c_T$  can range anywhere from 92.15% below the value in the 249  
average mouse to 4.69 times higher than the value in the average mouse. Compare this 250  
to the NLME-predicted values of  $c_T$ , which can range from 90.29% below the value in 251  
the average mouse to 31.87% below the value for the average mouse. What is clear from 252  
looking at the best-fit parameter values across methodologies is that it is not differences 253  
in a single (or small set) of parameter values that explain the difference in fits. The 254  
nonlinearities in the model simply do not allow the effects of one parameter to be easily 255  
teased out from the effects of the other parameters. 256

## Personalized Treatment Response at Experimental Dose 257

Here we seek to determine if the two sets of best-fit parameters for a single individual 258  
yield similar personalized predictions about tumor response to a range of treatment 259  
protocols. The treatment protocols we consider are modeled after the experimental work 260  
in [33]. Each day consists of only a single treatment, which can be either an injection of 261  
Ad/4-1BBL/IL-12 at  $2.5 \times 10^9$  viruses per dose, or a dose of  $10^6$  DCs. Treatment will 262  
be given for six days, with three days of treatment being Ad/4-1BBL/IL-12, and three 263  
days being DCs. If only one dose can be given per day, there are exactly 20 treatment 264  
protocols to consider. The 20 protocols are shown in Fig. 3, where  $V$  represents a dose 265  
of Ad/4-1BBL/IL-12, and  $D$  represents a dose of dendritic cells. 266

To quantify predicted tumor response, we will simulate mouse dynamics (using the 267  
determined best-fit parameters) for each of the 20 6-day protocols. Unless otherwise 268  
stated, we will use the predicted tumor volume after 30 days,  $V(30)$ , to quantify 269  
treatment response. For each fitting methodology, mouse, and protocol we display the 270  
 $\log(V(30))$  in a heatmap (as in Fig. 3). For all  $V(30) \leq 1 \text{ mm}^3$ , we display the 271  
logarithm as 0, as showing negative values would hinder cross-methodology comparison 272  
and overemphasize insignificant differences in treatment response. We consider all such 273  
tumors to be effectively treated by the associated protocol. Any nonzero values 274  
correspond to the value of  $\log(V(30))$  when  $V(30) > 1 \text{ mm}^3$ , and we assume these 275  
tumors have not been successfully treated. The resulting heatmap at the experimental 276  
dose of  $2.5 \times 10^9$  viruses per dose, and  $10^6$  DCs per dose is shown in Fig. 3. 277

Ideally, we would find that treatment response to a protocol for a given mouse is 278  
independent of the fitting methodology utilized (at least in the qualitative sense of 279  
treatment success or failure). However, that does not generally appear to be the case for 280  
our data, model and fitting methodologies, as we elaborate on here. 281

- **Cumulative statistics on consistencies across methodologies.** The two 282  
fitting methodologies give the same qualitative predictions for 73.75% (118/160) 283  
of the treatment protocols (see Fig. 3). Of the 118 agreements, 57 consistently 284  
predict treatment success whereas 61 consistently predict treatment failure. It is 285  
of note that these numbers only change slightly if we use  $V(80)$  as our 286  
measurement for determining treatment success or failure (81.875% agreement 287  
with 78/131 consistently predicting eradication and 53/131 consistently predicting 288  
failure - see Fig. S3). Mouse 2, 3 and 6 have perfect agreement across fitting 289  
methodologies, and Mouse 7 has 95% agreement across methodologies. For these 290  
mice, treatment response is generally not dependent on dosing order. For instance, 291  
Mouse 2 and 3 are successfully treated by all twenty protocols considered, whereas 292  
Mouse 6 cannot be successfully treated by any protocol. In fact,  $V(30)$  for Mouse 293  
6 is highly conserved across dosing order, suggesting that the ordering itself is 294

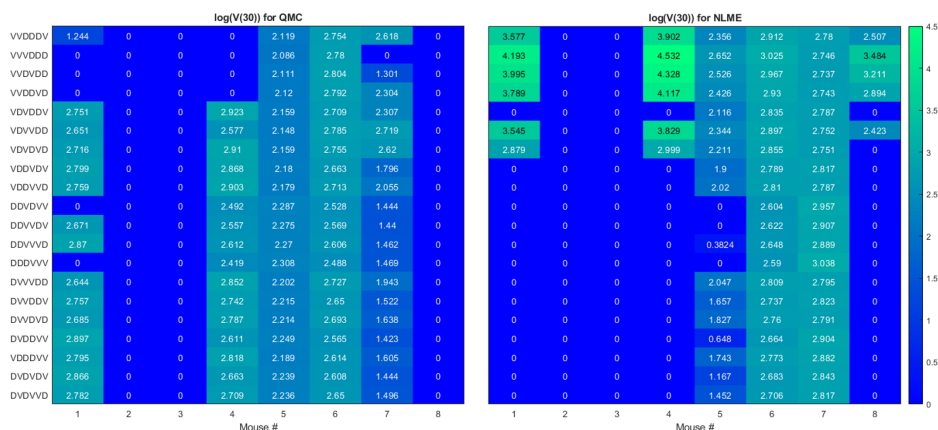

**Fig 3.** Heatmaps showing the log of the tumor volume measured at 30 days, at the OV and DC dose used in [33]. If  $\log(V(30)) \leq 1$ , its value is shown as 0 on the heatmap. Left shows predictions when parameters are fit using QMC, and right shows NLME predictions.

having minimal impact on treatment response. While performing a bifurcation analysis in 11D parameter space is not feasible, what is clear is that for the mice with significant agreement across methodologies, the best-fit parameters must be sufficiently far from the bifurcation surface, as shown in the schematic diagram in Fig. 4. As a result, predicted treatment response is not sensitive to changes in the parameter values that result from using a different fitting methodology. While not equivalent, they also do not appear to be sensitive to dosing order.

- Cumulative statistics on inconsistencies across methodologies.** The two fitting methodologies give different qualitative predictions for 26.25% (42/160) of the treatment protocols (see Fig. 3). Mouse 1 and 4 are largely responsible for these predictive discrepancies, with Mouse 1 having inconsistent predictions for 75% of protocols, and Mouse 4 having inconsistent predictions for 90% of protocols. Note that each methodology must agree for the protocol VDVDVD, as this was the experimental protocol that was used for parameter fitting. So, 95% is the maximum disagreement rate we can see across methodologies for a given mouse. We observe that the QMC-associated parameter set is much more likely to predict treatment failure for these mice, whereas the NLME parameter set is more likely to predict treatment success. Contrary to the mice for which there is significant cross-methodology agreement, we see a high dependency of treatment response to dosing order for Mouse 1 and 4. From the perspective of the high dimensional bifurcation diagram, these parameters must fall sufficiently close to the bifurcation surface so that parametric changes that result from using different fitting methodologies can lead to wildly different predictions about treatment response (see schematic in Fig. 4). In turn, this appears to make these mice significantly more sensitive to dosing order.

## Exploring Predictive Discrepancies between Fitting Methodologies

The predictive discrepancies across fitting methodologies begs the question of whether the parameters we are fitting are actually practically identifiable given the available experimental data. To explore this question, we generated profile likelihood curves for

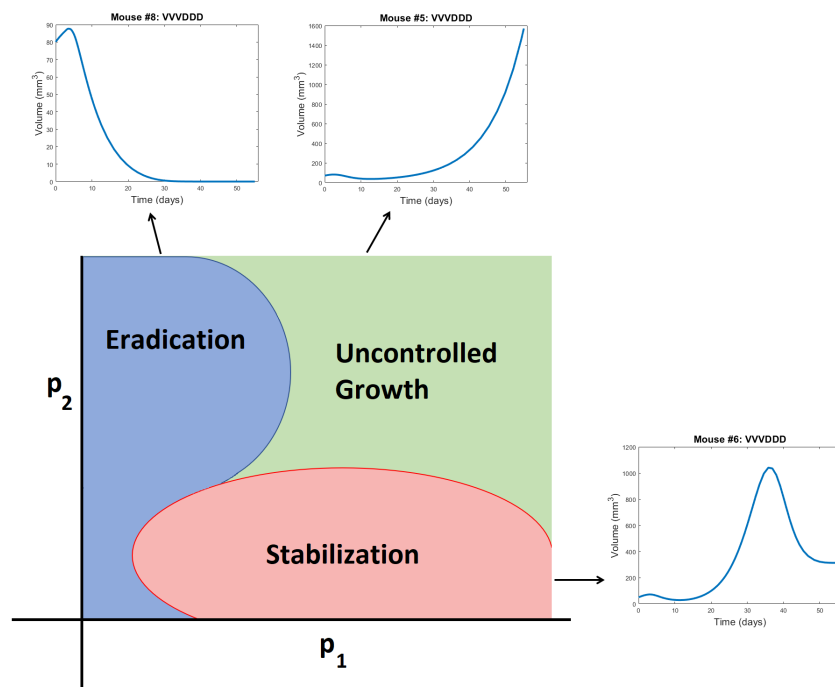

**Fig 4.** Schematic representation of a bifurcation diagram in two-dimensional parameter space. For certain nonlinear combinations of parameters, a treatment can successfully eradicate a tumor (as occurs for Mouse 8 treated with VVDDDD according to NLME parameters), result in tumor stabilization (as occurs for Mouse 6 treated with VVDDDD according to NLME parameters), or can fail to control the tumor (as occurs for Mouse 5 treated with VVDDDD according to NLME parameters). Note the bifurcation diagram is dependent on both the dose of drug being given, and the ordering of those drugs.

fitting the *average* tumor growth data. Parameter fitting follows the QMC algorithm 325  
presented in the subsection Independently Fitting Individuals, with the exception that 326  
the cost function utilizes the average volume  $\bar{V}_{data}(t)$  and incorporates the variance in 327  
the volume across mice ( $\sigma^2(t)$ ): 328

$$\zeta_2 = \sum_{t=1}^n \frac{(V_{model}(t) - \bar{V}_{data}(t))^2}{\sigma^2(t)}. \quad (11)$$

As a first step, we fixed the parameters whose values we could reasonably approximate 329  
from experimental data:  $\delta_I = 1$ ,  $\alpha = 3000$ ,  $\delta_V = 2.3$ ,  $\kappa_0 = 2$ ,  $\delta_T = 0.35$ , and 330  
 $\delta_D = 0.35$  [36]. This means we are using  $df = 5$  in the calculation of the threshold, as 331  
the generation of each profile likelihood curve requires fitting four model parameters, 332  
and the initial condition  $U(0)$ . 333

The resulting profile likelihood curves in Fig. 5 show that, even under the 334  
assumption that six of the eleven non-initial condition parameters are known, several of 335  
the fit model parameters lack practical identifiability. The tumor growth rate  $r$  and the 336  
infectivity parameter  $\beta$  are both practically identifiable (ignoring slight numerical noise). 337  
The T cell activation parameters  $\chi_D$  and  $c_T$  lack practical identifiability as they have 338  
profiles with a shallow and one-sided minimum [42]. The profile for  $c_{kill}$  demonstrates 339  
that the model can equally well-describe the data over a large range of values for this 340  
enhanced cytotoxicity parameter. The flat likelihood profile is indicative of (local) 341

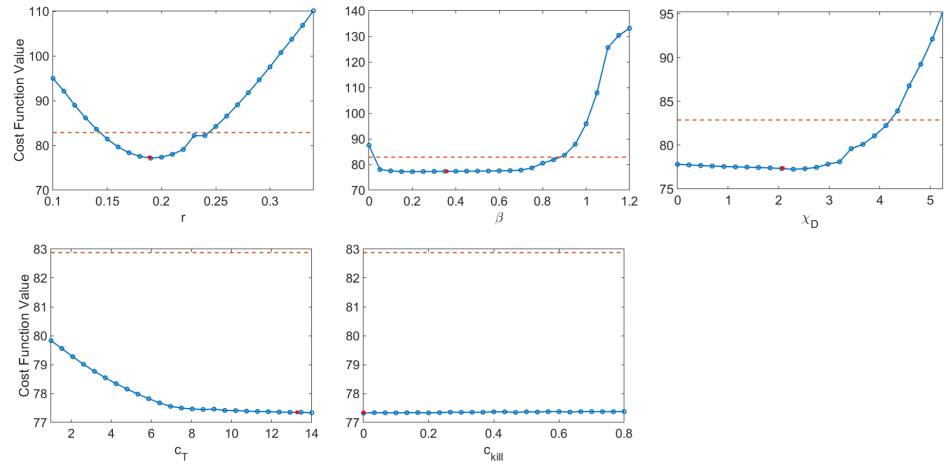

**Fig 5.** Profile likelihood curves. Top row: tumor growth rate  $r$ , infectivity rate  $\beta$ , T cell activation rate by DCs  $\chi_D$ . Bottom row: T cell stimulation rate by immunostimulants  $c_T$ , and rate at which immunostimulants enhance cytotoxicity of T cells  $c_{kill}$ . The threshold (red dashed line) is calculated using  $df = 5$  and a 95% confidence interval.

structural unidentifiability, which also results in the parameter being practically unidentifiable [42]. It is worth noting that the original work fitting to the average mouse was done in a *hierarchical* fashion [34, 36], and this circumvented the identifiability issues that emerge when doing simultaneous parameter fitting.

As we are unable to exploit the benefits of hierarchical fitting when performing personalized fits, this lack of practical identifiability poses significant issues for treatment personalization. We have already seen the consequences of this when we observed that despite both giving good fits to the data, QMC and NLME only make consistent qualitative predictions in only 73.75% of the treatment protocols tested across all individuals. While the lack of practical identifiability helps explain why this can happen, it does not explain the mechanisms that drive predictive differences. To this end, we will now focus on the simulated dynamics of Mouse 4 in more detail, as this was the mouse with the most predictive discrepancies across methodologies.

As shown in Fig. 6, when we simulate the model ten days beyond the data-collection window, we see that the QMC and NLME parameters fall on different sides of the bifurcation surface. In particular, in the QMC-associated simulation, at around 34 days the tumor exhibits a local maximum in volume and continues to shrink from there (Fig. 6, left). This is in comparison to the NLME-associated simulation, where the tumor grows exponentially beyond the data-collection window. To uncover the biological mechanism driving these extreme differences, we look at the “hidden” variables in our model - that is, variables for which we have no experimental data. As shown in Fig. 6, despite the similar fits to the volumetric data, the two parameters sets predict drastically different dynamics for the OV<sub>s</sub> and T cells. For the NLME-associated parameters, the virus and T cell population die out, eventually resulting in unbounded tumor growth. On the other hand, the virus and T cell population remain endemic throughout the simulation when using the QMC-associated parameters, driving the tumor population towards extinction.

Assuming that the source of the bifurcation in the model lies in the dynamics of the T cell and oncolytic virus population, additional data providing T cell or virus counts can better inform our model. That is, both the practical identifiability and the ability to perform personalized fits and predictions would be substantially improved with even a single data point about the viral or T cell load at the end of the data collection

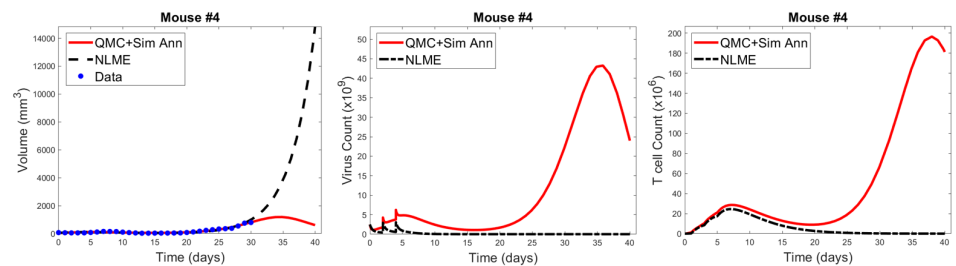

**Fig 6.** Left: QMC and NLME-associated fits to Mouse 4 treated with VDVVDV, with model predictions extended 10 days beyond the data-collection window. Center and right: Predicted virus and T cell counts associated with each fitting methodology, respectively.

window. This highlights that although one must be quite cautious in using mathematical models to make personalized predictions, models can help us determine what data is needed so that we can have more trust in our mathematical predictions.

## Personalized Treatment Response to the Optimal for Average Protocol

Ideally, when an optimal prediction is made for the average of a population, that optimal treatment protocol would also well-control the tumors of individual patients in the population. However, as is fairly common knowledge, and as our earlier work with virtual populations has shown, this is not necessarily the case. In [31] we showed that the experimental dose being considered in this paper is *fragile or non-robust*, meaning that individual samples in a population are not likely to have the same qualitative response to the optimal-for-the-average protocol. In particular, while VVVDDD was the optimal-for-the-average of the mice in the experiments (and this optimal led to tumor eradication for the average mouse [36]), we found only 30% of virtual populations were successfully eradicated by this protocol [31]. In a fragile region of dosing space, one must be very careful in applying a prediction for the average of a population to any one individual in that population.

Considering the fragile nature of this region of dosing space, it is interesting to look at statistics on how individual mice respond to VVVDDD, the predicted optimal treatment protocol for the average mouse. While this protocol was effectively able to eradicate the average tumor in the population, its success across individual mice varies significantly across fitting methodologies. For the QMC-associated predictions, this protocol eradicates tumors in 75% of the individual mice (second row of the heatmaps in Fig. 3, left). Compare this to the NLME-associated predictions, in which this protocol eradicates tumors in only 25% of the individual mice (second row of the heatmaps in Fig. 3, right). As shown in Fig. S3, this prediction is unchanged if we determine treatment success or failure at day 80 instead of day 30.

We can also compare response to the optimal-for-the-average protocol across methodologies. We see a qualitative agreement across methodologies (eradication or treatment failure) in only 50% of the mice (Mouse 2, 3, 5, 6). Mouse 7 is particularly interesting, as there was 95% agreement across methodologies when using  $V(30)$  to measure treatment success or failure, and the optimal for the average of VVVDDD is the only protocol for which treatment response differed (with QMC predicting tumor eradication, and NLME predicting treatment failure). As a further sign of caution, notice how for Mouse 1 and 4 (the cases with significant predictive discrepancies across methodologies), and Mouse 8 (intermediate case with 25% predictive discrepancies),

VVDDDD eradicates the tumor with the QMC-associated parameters yet is the **worst protocol** that could be given (largest  $\log(V(30))$ ) for the NLME-associated parameters. This is particularly unsettling as it means the population-level optimal treatment recommendation could be the worst-case scenario for some individuals. We saw this same phenomenon occur with virtual populations [31], and taken together this strongly suggests that a population-level prediction should be applied to individuals very cautiously when in a fragile region of dosing space.

This raises the question: what if we were assessing individualized response to the average protocol in a *robust* region of dosing space? In [31] we showed that the high DC (50% greater than experimental dose), low OV (50% lower than experimental dose) region of dosing space is robust, with 84% of virtual populations being successfully eradicated by the optimal-for-the-average protocol of DDDVVV. This statistic gives hope that individual mice may better respond to the optimal-for-the-average protocol in this robust region of dosing space.

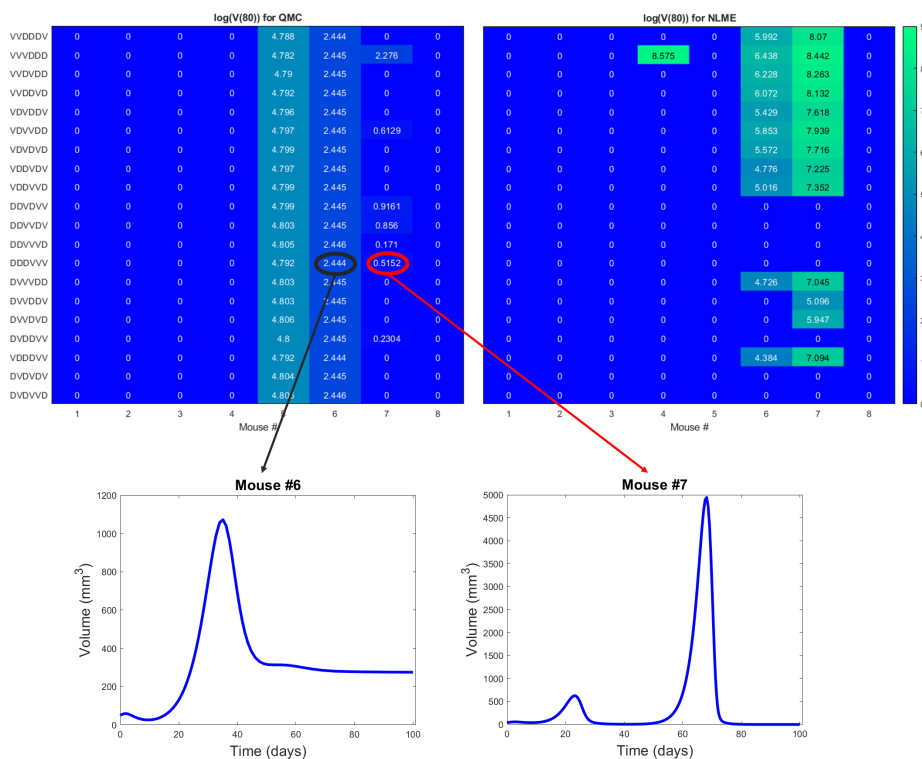

**Fig 7.** Heatmaps showing the log of the tumor volume measured at 80 days, at the high DC (50% greater than experimental dose), low OV (50% lower than experimental dose) region of dosing space. Left shows predictions if parameters are fit using QMC, and right shows NLME predictions. Inserts show time course of predicted treatment response for Mouse 6 and 7 to the optimal-for-the-average protocol of DDDVVV.

The robust population-level optimal of DDDVVV yields a successful treatment response in all eight mice for the NLME-associated parameters. This holds whether we use  $V(30)$ , our original measure for establishing treatment success (as shown in Fig. S4), or if we use  $V(80)$  as shown in Fig. 7. This is consistent with the robust nature of this region of dosing space, as the NLME-associated parameters are less likely to wildly deviate from the average mouse due to population-level distributions constraining the value of these parameters. In comparison, the QMC-associated predictions show that only 62.5% of the individual mice are successfully treated by the optimal for the average

in an 80-day window (Fig. 7, top left). That said, if we look at the data more closely, we can see that Mouse 7 has essentially been eradicated even though 80 days was not quite long enough to drive  $V(80) < 1 \text{ mm}^3$ , our threshold for eradication. Fig. 7 also shows that the tumor volume for Mouse 6 has stabilized. Thus, we see that the QMC-associated predictions actually agree with the optimal-for-the-average response in 75% of cases (or, 87.5% if you consider the stabilization of Mouse 6 to be a “success” rather than a “failure”).

In closing, we see a significant benefit to working with a robust optimal-for-the-average protocol, even in the absence of all model parameters being practically identifiable. In the presence of robustness, we predict that one could generally apply the optimal-for-the-average protocol and expect a qualitatively similar response in most individuals. While this does not mean each individual is treated with their personalized optimal protocol, this has important consequences for determining when a population-level prediction will be safe and effective in an individual.

## Conclusion

In this work, we demonstrated that making personalized treatment recommendations based on mathematical modeling is a nontrivial task, as treatment response can be sensitive to the fitting methodology utilized when lacking sufficient patient-specific data. We found that for our model and preclinical dataset, predictive discrepancies can be (at least somewhat) explained by the lack of practical identifiability of model parameters. This can result in the dangerous scenario where an effective treatment recommendation according to one fitting methodology is predicted to be the worst treatment option according to a different fitting methodology. This raises obvious concerns regarding the utility of mathematical models in personalized oncology.

That said, a mathematical model can also be used to determine what additional data is needed to improve parameter identifiability. For the model and data described herein, we see how having an additional measurement on the viral load or T cell count at the end of the data collection window would go a long way to reduce the predictive discrepancies across fitting methodologies (Fig. 6).

When additional data is not available, an alternative option to personalization is simply treating with the population-level optimal. Here we showed the dangers of applying the optimal-for-the-average for a fragile protocol, and we demonstrated that such a one-size-fits all approach is much safer to employ for a robust optimal protocol. Therefore, even when data is lacking to make personalized predictions, establishing the robustness of treatment response can be a powerful tool in predictive oncology.

As we enter the era of healthcare where personalized medicine becomes a more common approach to treating cancer patients, harnessing the power of mathematical models will only become more essential. Understanding the identifiability of model parameters, what data is needed to achieve identifiability, and whether treatment response is robust or fragile are all important considerations that can greatly improve the predictive abilities of mathematical models in personalized oncology.

## Acknowledgments

J.L.G would like to thank Dr. Joanna Wares and Dr. Eduardo Sontag for the many discussions that helped to develop the ideas in this manuscript. The authors are also grateful to Dr. Chae-Ok Yun for the exposure and access she provided to the rich dataset utilized in this work. E.N. would like to acknowledge Dr. Yang Kuang for his support at the early stages of this project. J.L.G and M.C.L. acknowledge use of the ELSA high-performance computing cluster at The College of New Jersey for conducting the research reported in this paper.

## References

1. Deisboeck TS. Personalizing medicine: a systems biology perspective. *Molec Sys Biol.* 2009;5:249.
2. Agur Z, Elishmereni M, Kheifetz Y. Personalizing oncology treatments by predicting drug efficacy, side-effects, and improved therapy: mathematics, statistics, and their integration. *WIREs Syst Biol Med.* 2014;6:239–253.
3. Barbolosi D, Ciccolini J, Lacarelle B, Barlési F, André N. Computational oncology - mathematical modelling of drug regimens for precision medicine. *Nat Rev Clin Oncol.* 2016;13:242–254.
4. Malaney P, Nicosia SV, Davé V. One mouse, one patient paradigm: New avatars of personalized cancer therapy. *Cancer Letters.* 2014;344:1–12.
5. Bryne AT, Alferez DG, Amant Fea. Interrogating open issues in cancer precision medicine with patient-derived xenografts. *Nature Rev Cancer.* 2017;17:254–268.
6. Engels FK, Loos WJ, van der Bol JM, de Bruijn P, Mathijssen RHJ, Verweij J, et al. Therapeutic Drug Monitoring for the Individualization of Docetaxel Dosing: A Randomized Pharmacokinetic Study. *Clin Cancer Res.* 2011;17:353–362.
7. Lorenzo MA, Guillermoand Scott, Tew K, Hughes TJR, Zhange YJ, Liu L, Vilanova G, et al. Tissue-scale, personalized modeling and simulation of prostate cancer growth. *Proc Natl Acad Sci.* 2016;113:E7663–E7671.
8. Walko CM, McLeod H. Pharmacogenomic progress in individualized dosing of key drugs for cancer patients. *Nat Clin Pract Oncol.* 2009;6:153–162.
9. Noble SL, Sherer E, Hammemann RE, Ramkrishna D, Vik T, Rundell AE. Using adaptive model predictive control to customize maintenance therapy chemotherapeutic dosing for childhood acute lymphoblastic leukemia. *J Theor Biol.* 2010;264:990–1002.
10. Patel JN. Personalizing chemotherapy dosing using pharmacological methods. *Cancer Chemother Pharmacol.* 2015;76:879–896.
11. Chantal P, Hopkins BD, Prandi D, Shaw R, Fedrizzi T, Sboner A, et al. Personalized In Vitro and In Vivo Cancer Models to Guide Precision Medicine. *Cancer Discovery.* 2017;7:462–477.
12. Ree AH, Redalen KR. Personalized radiotherapy: concepts, biomarkers and trial design. *Br J Radiol.* 2015;88:20150009.



13. Caudell JJ, Torres-Roca JF, Gillies RJ, Enderling H, Kim S, Rishi A, et al. The future of personalised radiotherapy for head and neck cancer. *Lancet Oncol.* 2017;18:e266–e273.
14. Sunassee ED, Tan D, Ji N, Brady R, Moros EG, Caudell JJ, et al. Proliferation saturation index in an adaptive Bayesian approach to predict patient-specific radiotherapy responses. *Int J Radiat Biol.* 2019;95:1421–1426.
15. Kim ES, Herbst RS, Wistuba II, Lee JJ, Blumenschein Jr GR, Tsao A, et al. The BATTLE Trial: Personalizing Therapy for Lung Cancer. *Cancer Discovery.* 2011;1:44–53.
16. Tsimberidou AM, Iskander NG, Hong DS, Wheeler JJ, Falchook GS, Fu S, et al. Personalized Medicine in a Phase I Clinical Trials Program: The MD Anderson Cancer Center Initiative. *Clin Cancer Res.* 2012;18:6373—6383.
17. Zhang J, Cunningham JJ, Brown JS, Gatenby RA. Integrating evolutionary dynamics into treatment of metastatic castrate-resistant prostate cancer. *Nature Comm.* 2017;8:1816.
18. Agur Z, Halevi-Tobias K, Kogan Y, Shlagman O. Employing dynamical computational models for personalizing cancer immunotherapy. *Expert Opin Biol Ther.* 2016;16:1373–1385.
19. Agur Z, Vuk-Pavlović S. Mathematical Modeling in Immunotherapy of Cancer: Personalizing Clinical Trials. *Molec Ther.* 2012;20:1–2.
20. Kogan Y, Forys U, Shukron O, Kronik N, Agur Z. Cellular Immunotherapy for High Grade Gliomas: Mathematical Analysis Deriving Efficacious Infusion Rates Based on Patient Requirements. *SIAM J Appl Math.* 2010;70:1953–1976.
21. Hawkins-Daruud A, Johnston SK, Swanson KR. Quantifying Uncertainty and Robustness in a Biomathematical Model-Based Patient-Specific Response Metric for Glioblastoma. *JCO Clin Cancer Inform.* 2019;3:1–8.
22. Vainas O, Ariad S, Amir O, Mermershtain W, Vainstein V, Kleiman M, et al. Personalising docetaxel and G-CSF schedules in cancer patients by a clinically validated computational model. *Br J Cancer.* 2012;107:814–822.
23. El-Madani M, Hénin E, Lefort T, Tod M, Freyer G, Cassier P, et al. Multiparameter Phase I trials: a tool for model-based development of targeted agent combinations—example of EVESOR trial. *Future Oncol.* 2015;11:1511–1518.
24. Zahid MU, Mohsin N, Mohamed ASR, Caudell JJ, Harrison LB, Fuller CD, et al. Forecasting Individual Patient Response to Radiotherapy in Head and Neck Cancer with a Dynamic Carrying Capacity Model. *International Journal of Radiation Oncology\*Biography\*Physics.* 2021;doi:<https://doi.org/10.1016/j.ijrobp.2021.05.132>.
25. Kronik N, Kogan Y, Elishmereni M, Halevi-Tobias K, Vuk-Pavlović S, Agur Z. Predicting outcomes of prostate cancer immunotherapy by personalized mathematical models. *PloS ONE.* 2010;5:e15482.
26. Hirata Y, Morino K, Akakura K, Higano CS, Bruchovsky N, Gambol T, et al. Intermittent Androgen Suppression: Estimating Parameters for Individual Patients Based on Initial PSA Data in Response to Androgen Deprivation Therapy. *PLoS ONE.* 2015;10:e0130372.

27. Hirata Y, Morino K, Akakura K, Higano CS, Aihara K. Personalizing Androgen Suppression for Prostate Cancer Using Mathematical Modeling. *Sci Reports*. 2018;8:2563.
28. Kogan Y, Halevi-Tobias K, Elishmereni M, Vuk-Pavlović S, Agur Z. Reconsidering the Paradigm of Cancer Immunotherapy by Computationally Aided Real-time Personalization. *Cancer Res*. 2012;72:2218–2227.
29. Elishmereni M, Kheifetz Y, Shukrun I, Bevan GH, Nandy D, McKenzie KM, et al. Predicting Time to Castration Resistance in Hormone Sensitive Prostate Cancer by a Personalization Algorithm Based on a Mechanistic Model Integrating Patient Data. *The Prostate*. 2016;76:48–57.
30. Gatenby RA, Silva AS, Gillies RJ, Frieden BR. Adaptive therapy. *Cancer Research*. 2009;69:4894–4903.
31. Barish S, Ochs MF, Sontag ED, Gevertz JL. Evaluating optimal therapy robustness by virtual expansion of a sample population, with a case study in cancer immunotherapy. *Proc Natl Acad Sci*. 2017;114:E6277–E6286.
32. Cassidy T, Craig M. Determinants of combination GM-CSF immunotherapy and oncolytic virotherapy success identified through in silico treatment personalization. *PLOS Computational Biology*. 2019;15(11):1–16. doi:10.1371/journal.pcbi.1007495.
33. Huang JH, Zhang SN, Choi KJ, Choi IK, Kim JH, Lee M, et al. Therapeutic and tumor-specific immunity induced by combination of dendritic cells and oncolytic adenovirus expressing IL-12 and 4-1BBL. *Molecular Therapy*. 2010;18:264–274.
34. Gevertz JL, Wares JR. Developing a minimally structured model of cancer treatment with oncolytic viruses and dendritic cell injections. *Comp Math Meth Med*. 2018;2018:8760371.
35. Kim PS, Crivelli JJ, Choi IK, Yun CO, Wares JR. Quantitative impact of immunomodulation versus oncolysis with cytokine-expressing virus therapeutics. *Math Biosci Eng*. 2015;12:841–858.
36. Wares JR, Crivelli JJ, Yun CO, Choi IK, Gevertz JL, Kim PS. Treatment strategies for combining immunostimulatory oncolytic virus therapeutics with dendritic cell injections. *Math Biosci Eng*. 2015;12:1237–1256.
37. Kucherenko S, Albrecht D, Saltelli A. Exploring multi-dimensional spaces: a Comparison of Latin Hypercube and Quasi Monte Carlo Sampling Techniques. *arXiv*. 2015;1505.02350.
38. Torquato S. *Random Heterogeneous Materials: Microstructure and Macroscopic Properties*. Springer-Verlag New York; 2002.
39. Olofsen E, Dinges D, Van Dongen H. Nonlinear Mixed-Effects Modeling: Individualization and Prediction. *Aviat Space Environ Med*. 2004;75:A134–140.
40. Myung J I. Tutorial on Maximum Likelihood Estimation. *Journal of Mathematical Psychology*. 2003;47:90–100.
41. Lixoft. Monolix. <https://lixoft.com/products/monolix/>. 2021;.
42. Eisenberg MC, Harsh EJ. A confidence building exercise in data and identifiability: Modeling cancer chemotherapy as a case study. *J Theor Biol*. 2017;431:63–78.

43. Venzon DJ, Moolgavkar SH. A method for computing profile-likelihood based confidence intervals. *Appl Stat.* 1988;37:87–94.
44. Murphy SA, Van Der Vaart AW. On profile likelihood. *Journal of American and Statistical Association.* 2000;95:449–485.
45. Tonsing C, Timmer J, Kreutz C. Profile likelihood-based analyses of infectious disease models. *Statistical Methods in Clinical Research.* 2018;27:1979–1998.
46. Sivia DS, Skilling J. *Data analysis: A Bayesian tutorial.* Oxford University Press; 2006.
47. Maiwald T, Hass H, Steiert B, Vanlier J, Engesser R, Raue A, et al. Driving the Model to Its Limit: Profile Likelihood Based Model Reduction. *PLOS ONE.* 2016;11:1–18.

## Supporting information

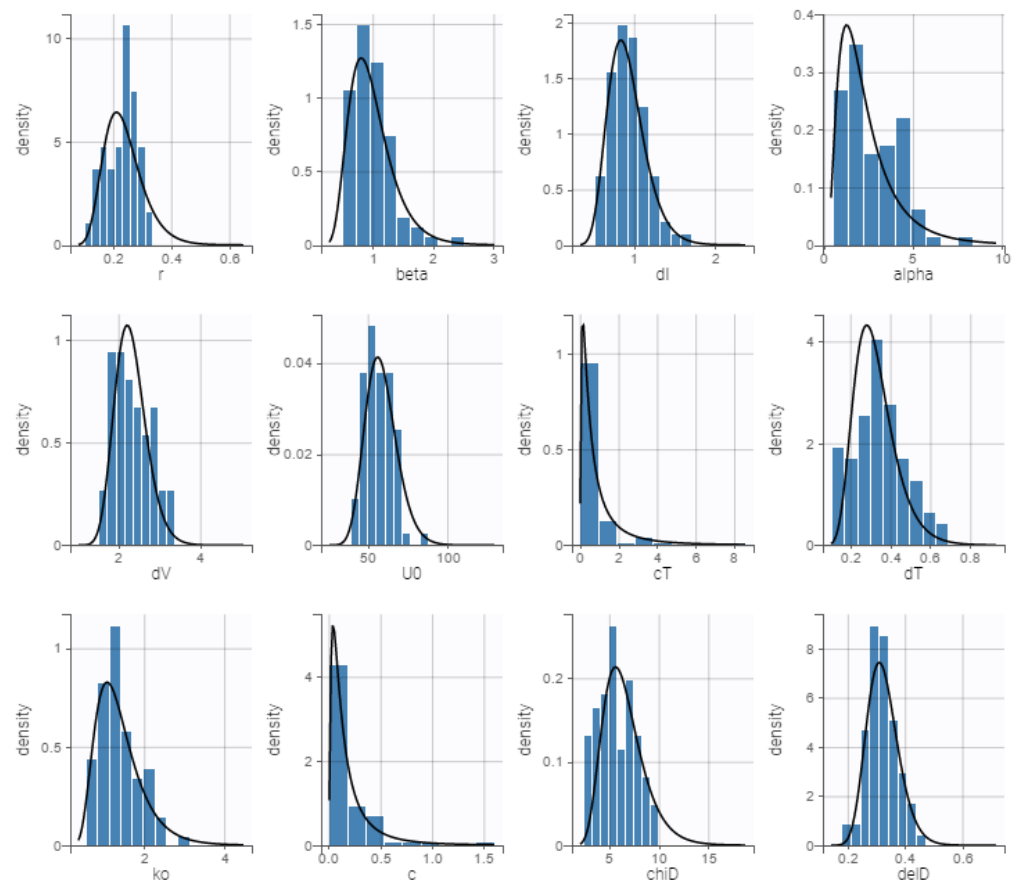

**Fig S1.** Estimated parameter distributions from Monolix’s implementation of NLME. Each parameter is assumed to be lognormally distributed. The blue bars in each graph represent the empirical distribution of the parameter estimation and the black line represents the theoretical distribution.

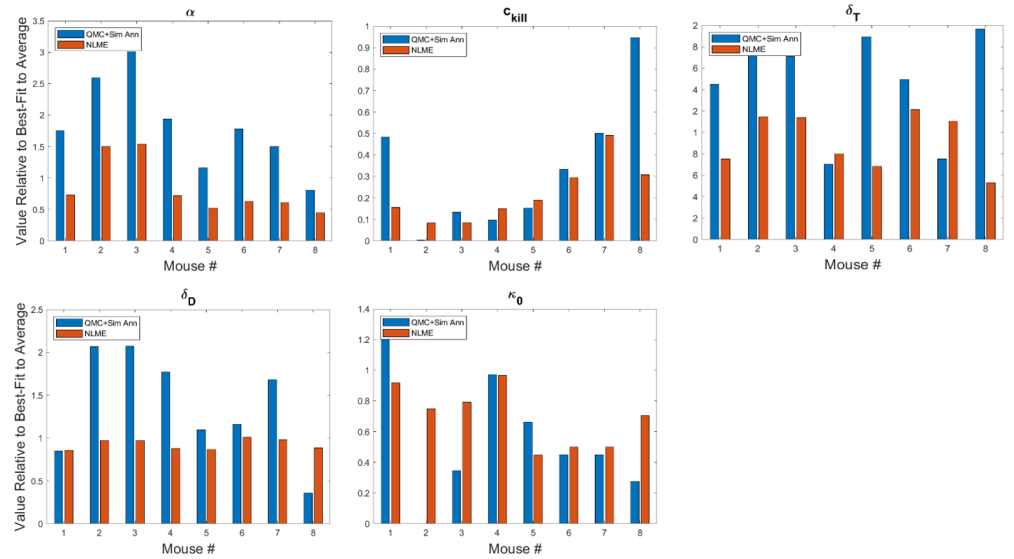

**Fig S2.** Best-fit value of number of viruses released by lysed cell  $\alpha$ , the cytotoxicity enhancement term due to immunostimulants  $c_{kill}$ , T cell decay rate  $\delta_T$ , DC decay rate  $\delta_D$ , and default cytotoxicity rate of T cells  $\kappa_0$ . The best-fit values are shown for each mouse and are presented relative to the best-fit value of the parameter in the average mouse [34]. Therefore, a value of 1 means the parameter value is equal to that in the average mouse, less than 1 is a smaller value, and greater than 1 is a larger value.

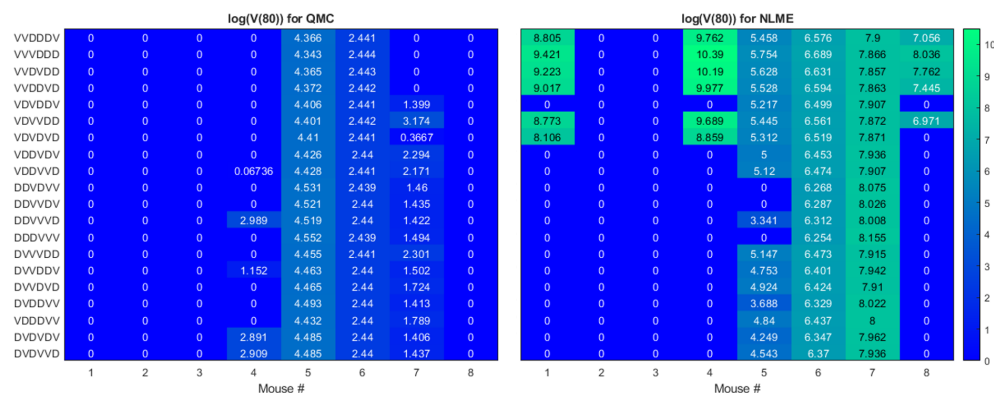

**Fig S3.** Heatmaps showing the log of the tumor volume measured at 80 days, at the OV and DC dose used in [33]. Left shows predictions when parameters are fit using QMC and right shows NLME predictions. Compare to heatmap in Fig. 3 which shows the log of the tumor volume 50 days earlier.

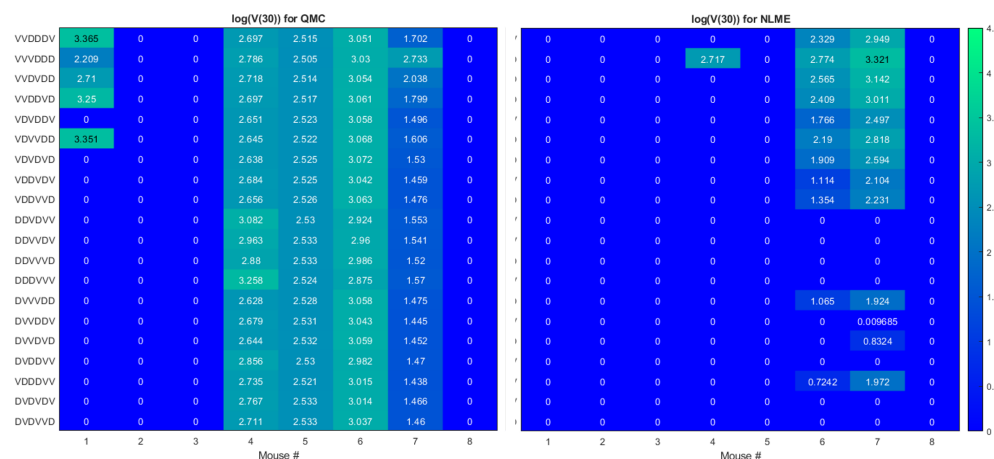

**Fig S4.** Heatmaps showing the log of the tumor volume measured at 30 days, at the high DC (50% greater than experimental dose), low OV (50% lower than experimental dose) region of dosing space. Left shows predictions if parameters are fit using QMC and right shows NLME predictions. Compare to heatmap in Fig. 7 which shows the log of the tumor volume 50 days later.
